# Supplementary material for: Hapalosiphonacean cyanobacteria (Nostocales) thrived amid emerging embryophytes in an early Devonian (407-million-year-old) landscape
Source: PubMed Central journal article supplement — iScience. 2023 Jul 10;26(8):107338. doi: 10.1016/j.isci.2023.107338 (PMC10382934; doi:10.1016/j.isci.2023.107338), 2023-07-10
Supplement: mmc1.pdf [file mmc1.pdf]

iScience, Volume 26

## **Supplemental information**

**Hapalosiphonacean cyanobacteria (Nostocales)  
thrived amid emerging embryophytes in an early  
Devonian (407-million-year-old) landscape**

**Christine Strullu-Derrien, Frédéric Fercoq, Marc Gèze, Paul Kenrick, Florent Martos, Marc-André Selosse, Karim Benzerara, and Andrew H. Knoll**

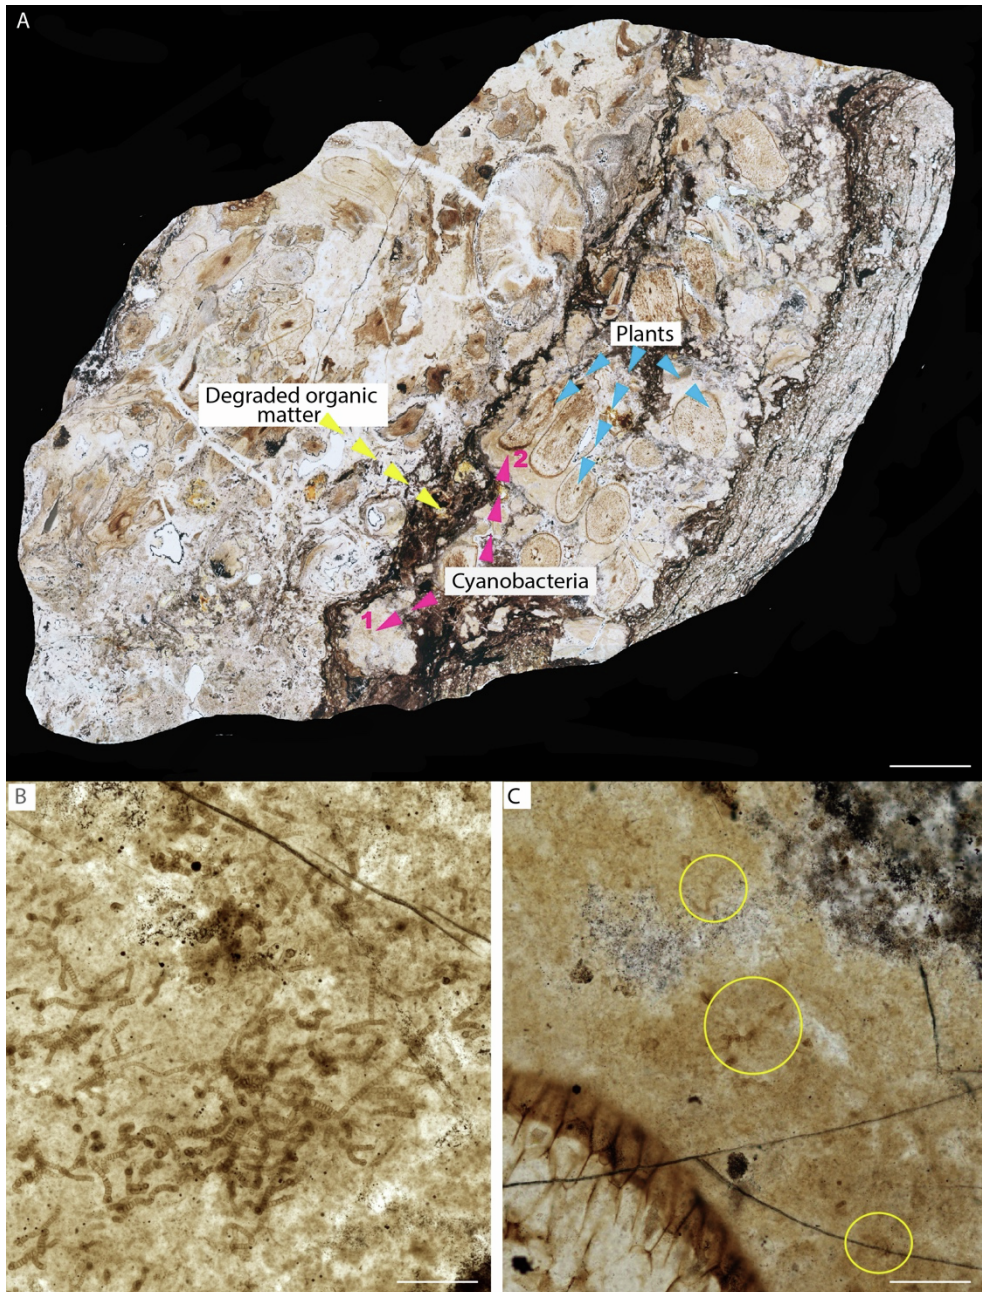

1

2 Supplementary fig. 1. A. Light microscopy image of the whole thin section SU.PB.2023.0.1.2.8  
 3 showing the different components. B, C. Light microscopy images of *Langiella scourfieldii* Croft  
 4 and George 1959, emend. Strullu-Derrien and Knoll from zone 1 (image A) and from zone 2  
 5 (image A). From thin section SU.PB.2023.0.1.2.8. Scale-bar = 2,2 mm (A), 0.16 mm (B, C).

6

7

8

9

10  
11  
12

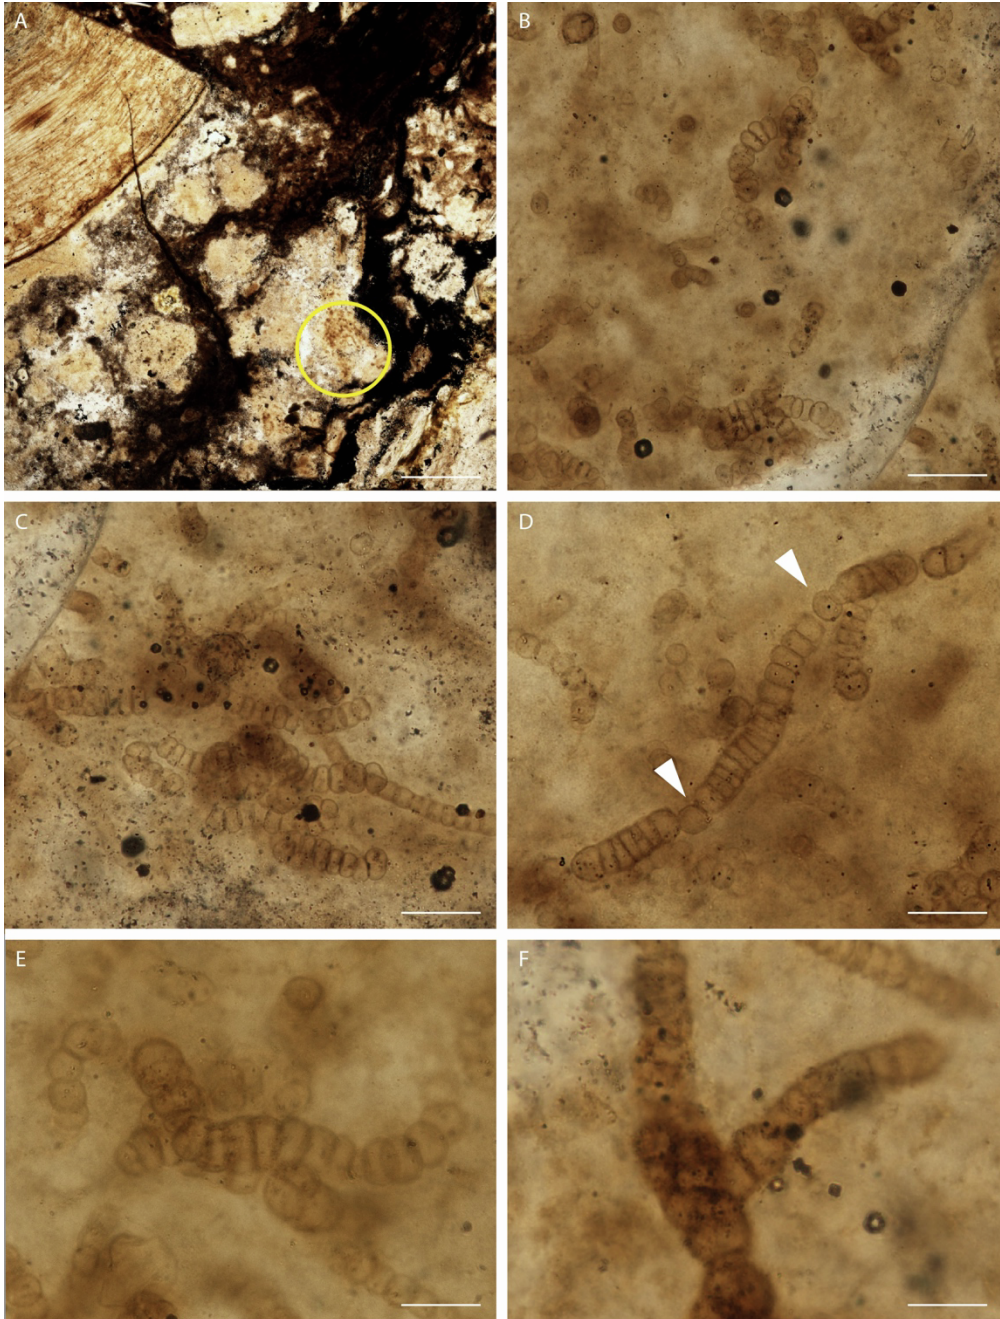

13

14 Supplementary figure 2. Light microscopy images of *Langiella scourfieldii* Croft and George  
15 1959, emend. Strullu-Derrien and Knoll. A, B. Cyanobacteria as part of a ground cover (circle).  
16 C, E. Filaments interlaced with one another. D. Necridia visible on one filament. F. Filament  
17 lighty multiseriate (higher magnification of part of figure 11 main manuscript). From thin section  
18 SU.PB.2023.0.1.2.9. Scale bars: 0.5mm (A), 50  $\mu$ m (B, C), 30  $\mu$ m (D), 20  $\mu$ m (E), 18  $\mu$ m (F).
